# Supplementary material for: Knowledge and Attitudes towards Handling Eggs in the Home: An Unexplored Food Safety Issue?
Source: PubMed Central journal article supplement (PMC5295299; doi:10.3390/ijerph14010048), 2017-01-06

# Supplementary Materials: Knowledge and Attitudes towards Handling Eggs in the Home: An Unexplored Food Safety Issue?

Harriet Whiley, Beverley Clarke and Kirstin Ross

## Survey Questions: Consumer's Attitudes towards Eggs and Food Safety in the Home

Hi,

We are a team of researchers from Flinders University conducting a survey on consumer's attitudes towards eggs and food safety in the home. Are you over 18 and available to spare a couple of minutes of your time to complete this short survey?

Thank you very much for your time.

Dr. Harriet Whiley, Dr. Kirstin Ross and Associate Professor Beverley Clarke

*The following questions relate to your choices when purchasing eggs*

1. What type of eggs do you mostly buy?
  - Organic (go to question 4)
  - Free range (go to question 4)
  - Barn (go to question 4)
  - Caged (go to question 4)
  - Pasteurised (go to question 4)
  - Any, I don't have a preference (go to question 4)
  - I keep poultry and collect my own eggs (go to question 2)
2. If an egg is dirty, typically what do you do with it?
  - Use it
  - Discard it
  - Wash it
  - Wipe it
  - Other\_\_\_\_\_ (please specify)
3. If an egg is cracked what do you do with it?
  - Use it
  - Discard it
  - Wash it
  - Wipe it
  - Other\_\_\_\_\_ (please specify)
4. Where do you typically store your eggs?
  - Fridge
  - Shelf

*The following questions relate to food preparation in the home*

5. Do you consume raw eggs or raw egg products at home?
  - Yes
  - No
  - Other\_\_\_\_\_ (please specify)
6. How often would you wash your hands after handling eggs during food preparation?
  - Never
  - Sometimes

Always  
If yolk gets on my hand

7. Have you even eaten raw mixture/batter containing eggs (or licked bowl, spoon, spatula, etc.)?  
Yes  
No
8. Please complete the following  
I wipe down the bench after handling raw eggs  
Always  
Mostly  
Sometimes  
Never

*The following questions relate to you*

9. Gender?  
Male  
Female  
Transgender
10. Age?  
25 or under  
26-35  
36-45  
46-55  
56-65  
Over 65
11. Occupation?
12. What is your highest level of education completed?  
Less than Year 12 or equivalent  
Year 12 or equivalent (\*HSC/Leaving cert)  
Vocational Qualification  
Undergraduate diploma  
Bachelor degree (including honours)  
Postgraduate diploma  
Master's degree  
Doctorate
13. What is your country of residence?  
Australia  
Other\_\_\_\_\_ (please specify)

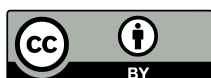

Supplement: ijerph-14-00048-s001.pdf [file ijerph-14-00048-s001.pdf]
